# Supplementary material for: Genome-Wide Identification, Characterization, and Expression Analysis of the HD-Zip Gene Family in Lagerstroemia for Regulating Plant Height
Source: MDPI journal article supplement (doi:10.3390/genes15040428), 2024-03-28
Supplement: s1 [file s1]

**Table S1.** The primers sequences used in this study.

| Name          | Forward                 | Tm(°C) | GC%  | Reverse                 | Tm(°C) | GC%  |
|---------------|-------------------------|--------|------|-------------------------|--------|------|
| LinHDZ1       | AGCCATACAACCTCTTCAAGGG  | 55.90  | 47.6 | AAAGAGATTGCTAGTCGGCG    | 58.23  | 50.0 |
| LinHDZ9       | AATGGACAACGGGAAGTACG    | 54.97  | 50.0 | CGATGTTGGAGAGGATTGGG    | 56.10  | 55.0 |
| LinHDZ14      | AGAGATTGTACCACGAATGCC   | 55.82  | 56.7 | ATGCCTCTTTCCTCTGCTTC    | 56.73  | 50.0 |
| LinHDZ23      | TGACCAGTTTGCATCTCAGAG   | 56.86  | 47.6 | GTCCCTGTAGAACCGATGAAC   | 55.03  | 52.4 |
| LinHDZ24      | CGAGTCTGTGGTCTTGTTAGTC  | 56.74  | 50.0 | CTCTATTGTCCCTCCATTTCCAG | 57.17  | 47.8 |
| LinHDZ27      | CAGTTGGTGTACGAAAATGGC   | 55.21  | 47.6 | CAGCTTGTGTCTTTGGTTGC    | 55.86  | 50.0 |
| LinHDZ30      | CTCCGACATCCTCAGACTAAATG | 58.05  | 47.8 | TGGTTGGGTTATGGTCGTG     | 53.29  | 50.0 |
| LinHDZ32      | CTTCACCATGTTCCCTGCTAG   | 57.01  | 52.4 | ACCACAAGACTGCCATTATCC   | 54.94  | 47.6 |
| LinHDZ34      | GATACATCCTACATACCGCTGC  | 57.07  | 50.0 | ACCACTGTCACCAACGAAC     | 53.35  | 50.0 |
| LinHDZ35      | GTGAGTCTGTGGTCATGAGTG   | 55.73  | 52.4 | TTTGAGAGGAACTGTGCGAG    | 56.89  | 50.0 |
| LinHDZ36      | AGTGAATCGGAAACTGACGG    | 55.84  | 50.0 | TGGTGTAGTGTGAAGTTGCTG   | 55.91  | 47.6 |
| LinHDZ51      | TCAACACCATCAGCATCCTC    | 55.07  | 50.0 | GAATGACACCGATCTCTTCCC   | 55.69  | 52.4 |
| EF-1 $\alpha$ | GACTGTGCTGTGCTCATC      | 53.72  | 55.6 | GTGGCATCCATCTTGTTG      | 50.89  | 50.0 |

**Table S2.** The differential expression levels of LinHDZ III subfamily in S\_TS vs. S\_SAM. The tender stem (S\_TS) , shoot apical meristem (S\_SAM) of non-dwarf crape myrtle.

| subfamily | gene name | gene_id        | S_TS1    | S_TS2    | S_TS3    | S_SAM1   | S_SAM2   | S_SAM3   | S_TS     | S_SAM    | log2FoldChange | pvalue                |
|-----------|-----------|----------------|----------|----------|----------|----------|----------|----------|----------|----------|----------------|-----------------------|
| III       | LinHDZ24  | Lin_chr12_1084 | 1358.015 | 1376.526 | 1288.467 | 557.0692 | 516.4694 | 496.9492 | 1341.003 | 523.4959 | 1.356687       | 7.8×10 <sup>-57</sup> |
| III       | LinHDZ14  | Lin_chr8_0118  | 1168.682 | 1063.178 | 1058.236 | 418.7303 | 392.4811 | 380.0778 | 1096.699 | 397.0964 | 1.464749       | 2.8×10 <sup>-54</sup> |
| III       | LinHDZ9   | Lin_chr4_1747  | 796.7775 | 826.9164 | 864.1403 | 710.2632 | 710.9259 | 620.6954 | 829.2781 | 680.6282 | 0.284616       | 2.27×10 <sup>-3</sup> |
| III       | LinHDZ35  | Lin_chr15_0967 | 1950.809 | 1839.038 | 1970.901 | 1690.705 | 1771.517 | 1781.553 | 1920.249 | 1747.925 | 0.135466       | 3.74×10 <sup>-2</sup> |

**Table S3.** The differential expression levels of LinHDZ III subfamily in S\_MS vs. S\_SAM. The mature stem (S\_MS) of non-dwarf crape myrtle.

| subfamily | gene name | gene_id        | S_MS1    | S_MS2    | S_MS3    | S_SAM1   | S_SAM2   | S_SAM3   | S_MS     | S_SAM    | log2FoldChange | pvalue                 |
|-----------|-----------|----------------|----------|----------|----------|----------|----------|----------|----------|----------|----------------|------------------------|
| III       | LinHDZ14  | Lin_chr8_0118  | 1160.541 | 1093.613 | 1113.499 | 430.8548 | 401.8452 | 388.5078 | 1122.551 | 407.0693 | 1.462839       | 1.54×10 <sup>-58</sup> |
| III       | LinHDZ24  | Lin_chr12_1084 | 1196.114 | 1154.596 | 1278.954 | 573.1993 | 528.7917 | 507.9714 | 1209.888 | 536.6542 | 1.1729         | 1.24×10 <sup>-40</sup> |
| III       | LinHDZ35  | Lin_chr15_0967 | 2182.129 | 2015.461 | 2131.908 | 1739.66  | 1813.783 | 1821.068 | 2109.832 | 1791.503 | 0.235764       | 9.71×10 <sup>-05</sup> |
| III       | LinHDZ9   | Lin_chr4_1747  | 1016.03  | 849.6848 | 803.5066 | 730.8291 | 727.8877 | 634.4623 | 889.7403 | 697.7264 | 0.348765       | 7.42×10 <sup>-4</sup>  |

**Table S4.** The differential expression levels of LinHDZ III subfamily in D\_TS vs. D\_SAM. The tender stem (D\_TS), shoot apical meristem (D\_SAM) of dwarf crape myrtle.

| subfamily | gene name | gene_id        | D_TS1    | D_TS2    | D_TS3    | D_SAM1   | D_SAM2   | D_SAM3   | D_TS     | D_SAM    | log2FoldChange | pvalue                 |
|-----------|-----------|----------------|----------|----------|----------|----------|----------|----------|----------|----------|----------------|------------------------|
| III       | LinHDZ9   | Lin_chr4_1747  | 840.924  | 865.541  | 820.7082 | 176.424  | 169.2423 | 200.7617 | 842.3911 | 182.1427 | 2.210687       | 8.1×10 <sup>-77</sup>  |
| III       | LinHDZ24  | Lin_chr12_1084 | 1078.878 | 1054.942 | 1146.768 | 313.0761 | 364.6562 | 347.6605 | 1093.529 | 341.7976 | 1.676443       | 3.03×10 <sup>-60</sup> |
| III       | LinHDZ35  | Lin_chr15_0967 | 2465.016 | 2446.935 | 2786.332 | 1074.861 | 855.8079 | 996.9533 | 2566.095 | 975.874  | 1.396642       | 5.82×10 <sup>-54</sup> |
| III       | LinHDZ14  | Lin_chr8_0118  | 833.9933 | 929.6928 | 997.6329 | 489.5002 | 539.1328 | 425.0273 | 920.4397 | 484.5534 | 0.925672       | 2.41×10 <sup>-16</sup> |

**Table S5.** The differential expression levels of LinHDZ III subfamily in D\_MS vs. D\_SAM. The mature stem (D\_MS) of dwarf crape myrtle.

| subfamily | gene name | gene_id        | D_MS1    | D_MS2    | D_MS3    | D_SAM1   | D_SAM2   | D_SAM3   | D_MS     | D_SAM    | log2FoldChange | pvalue                 |
|-----------|-----------|----------------|----------|----------|----------|----------|----------|----------|----------|----------|----------------|------------------------|
| III       | LinHDZ9   | Lin_chr4_1747  | 1009.655 | 961.1549 | 973.6287 | 184.1189 | 176.6712 | 208.7511 | 981.4796 | 189.847  | 2.371106       | 2.25×10 <sup>-95</sup> |
| III       | LinHDZ24  | Lin_chr12_1084 | 1084.486 | 998.3888 | 1010.577 | 326.7311 | 380.6627 | 361.4957 | 1031.15  | 356.2965 | 1.530646       | 1.61×10 <sup>-49</sup> |
| III       | LinHDZ35  | Lin_chr15_0967 | 2214.764 | 2189.009 | 2189.916 | 1121.741 | 893.3736 | 1036.627 | 2197.896 | 1017.247 | 1.112874       | 1.84×10 <sup>-37</sup> |
| III       | LinHDZ14  | Lin_chr8_0118  | 1199.524 | 1126.543 | 1105.443 | 510.85   | 562.798  | 441.9413 | 1143.837 | 505.1964 | 1.177144       | 6.94×10 <sup>-30</sup> |

**Table S6.** The differential expression levels of LinHDZ III subfamily in D\_SAM vs. S\_SAM. The shoot apical meristem (S\_SAM) of non-dwarf crape myrtle and the shoot apical meristem (D\_SAM) of dwarf crape myrtle.

| subfamily | gene name | gene_id        | D_SAM1   | D_SAM2   | D_SAM3   | S_SAM1   | S_SAM2   | S_SAM3   | D_SAM    | S_SAM    | log2FoldChange | pvalue                 |
|-----------|-----------|----------------|----------|----------|----------|----------|----------|----------|----------|----------|----------------|------------------------|
| IV        | LinHDZ23  | Lin_chr12_0875 | 108.1562 | 87.31895 | 123.7056 | 405.5339 | 391.5854 | 437.6332 | 106.3936 | 411.5842 | -1.95559       | 1.88×10 <sup>-31</sup> |
| IV        | LinHDZ34  | Lin_chr15_0706 | 224.0378 | 226.8394 | 190.8905 | 612.535  | 543.7186 | 551.02   | 213.9226 | 569.0912 | -1.4107        | 2.63×10 <sup>-26</sup> |
| IV        | LinHDZ42  | Lin_chr18_1155 | 1354.16  | 1264.226 | 1133.613 | 2193.271 | 2056.949 | 2223.972 | 1250.666 | 2158.064 | -0.78701       | 1.91×10 <sup>-21</sup> |
| IV        | LinHDZ37  | Lin_chr16_0678 | 578.3045 | 530.5575 | 524.6824 | 738.6175 | 772.3685 | 812.6053 | 544.5148 | 774.5304 | -0.50871       | 6.55×10 <sup>-07</sup> |
| IV        | LinHDZ10  | Lin_chr5_0193  | 229.556  | 215.45   | 184.492  | 375.4247 | 314.1685 | 280.4831 | 209.8327 | 323.3588 | -0.62441       | 1.29×10 <sup>-4</sup>  |
| IV        | LinHDZ5   | Lin_chr2_1932  | 48.55992 | 21.82974 | 34.12568 | 57.39575 | 66.61453 | 41.77408 | 34.83845 | 55.26145 | -0.67494       | 7.52×10 <sup>-2</sup>  |
| IV        | LinHDZ49  | Lin_chr21_1054 | 75.04715 | 89.21718 | 125.8385 | 57.39575 | 103.5226 | 92.49974 | 96.70093 | 84.47269 | 0.194558       | 4.97×10 <sup>-1</sup>  |
| IV        | LinHDZ18  | Lin_chr9_1614  | 50.76719 | 51.25243 | 63.98566 | 47.98661 | 69.31512 | 52.71491 | 55.33509 | 56.67221 | -0.03673       | 9.07×10 <sup>-1</sup>  |

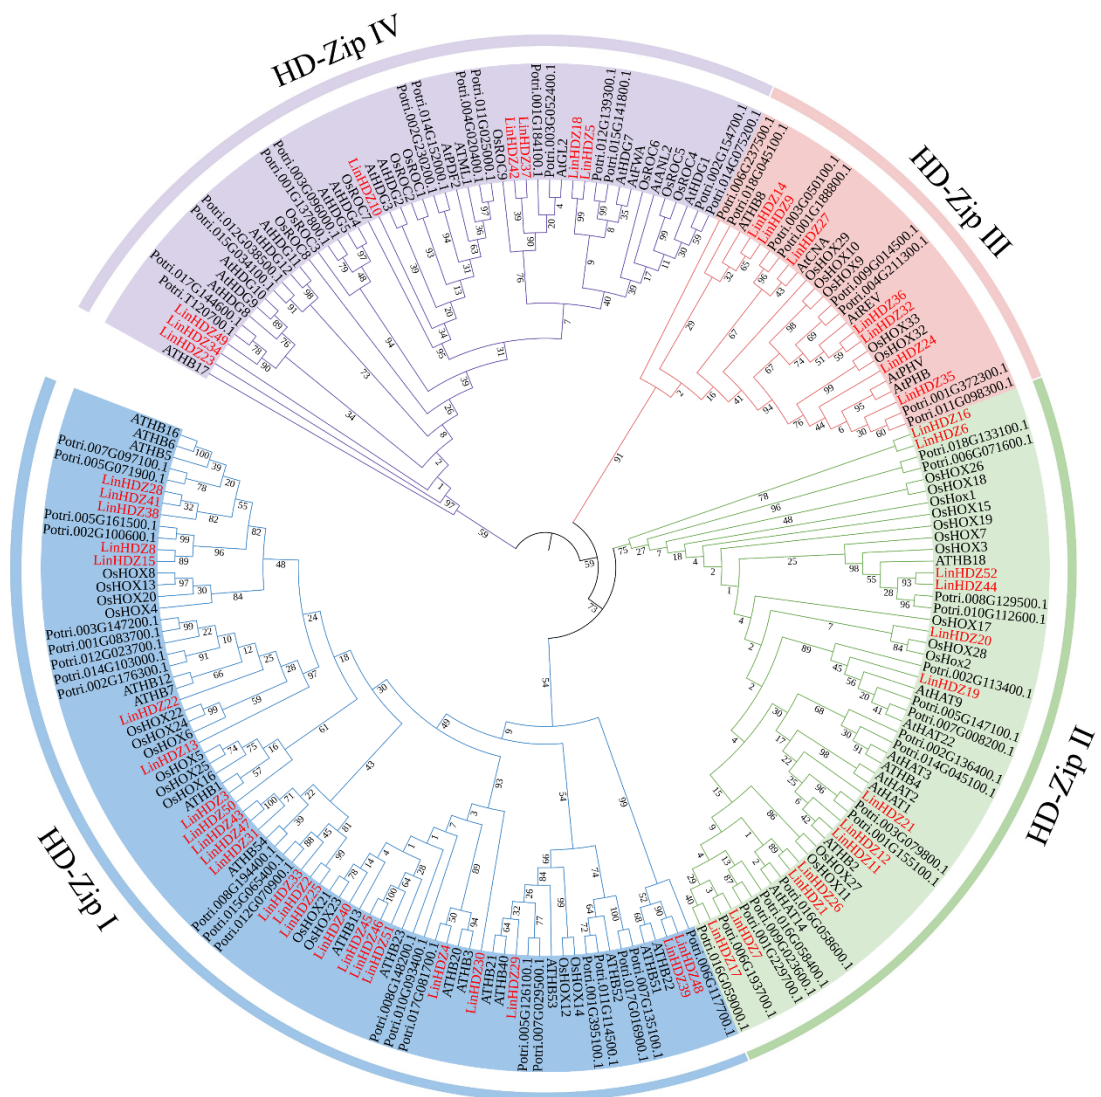

**Figure S1.** Phylogenetic tree analysis of HD-Zip sequences of *Lagerstroemia indica* and other plants. All *LinHDZ* genes in *Lagerstroemia indica* were marked in red font. Numbers on the branch of the phylogenetic tree represent bootstrap values.
